# Supplementary material
Source: publisher figshare collection journal article supplement (https://acs.figshare.com/ndownloader/files/4564720)
Supplement: Supplementary file 1 [file 4564720]

# Two-Dimensional Differential Gel Electrophoresis of a Cell Line derived from a Breast Cancer Micrometastasis Revealed a Stem/Progenitor Cell Protein Profile

*Kai Bartkowiak, Marek Wieczorek, Friedrich Buck, Sönke Harder, Jennifer Moldenhauer, Katharina E. Effenberger, Klaus Pantel, Jasna Peter-Katalinic, and Burkhard H. Brandt*

## Supporting Information

Supplementary experimental procedures

**1-D SDS-PAGE and Western Blot Analysis.** 1-D protein separation was done with the Novex XCell Sure-Lock mini system (Invitrogen, Groningen, Netherlands) using 10% polyacrylamide separation gels<sup>1</sup>. Samples were diluted in SDS-sample buffer, heat denatured at 95°C for 5 min and loaded onto the gel under the following running conditions: 84 V for 1 h and 130 V until the dye front reached the edge of the gel. The molecular size standard was the peqGOLD protein-marker V (Peqlab, Erlangen, Germany). Gel staining was performed according to Neuhoff<sup>2</sup>.

For Western Blot analysis samples (25 µg of protein; except for CK5, where 5 µg were applied) were separated by SDS-PAGE as described and transferred to a PDVF membrane under semi-dry conditions. Cytokeratins were detected using the following primary antibodies: anti-cytokeratin 5 [XM26] antibody (abcam, Cambridge, United Kingdom), 1: 5000 dilution; anti-cytokeratin 7 clone OV-TL 12/30 (DAKO, Glostrup; Denmark), 1:10000 dilution; anti-Keratin K8 clone K8.2 (Progen, Heidelberg, Germany), 1:10000 dilution; anti-Keratin K17 clone Ks17.E3 (Progen, Heidelberg, Germany), 1:500 dilution; anti-Keratin K18 clone K18.04 (Progen, Heidelberg, Germany), 1:10000 dilution, and anti-Cytokeratin 19, clone BA 17 (Millipore GmbH, Schwalbach), 1:10000 dilution. Other antibodies: anti-vimentin

antibody (clone V9) from Sigma, 1:5000 dilution; anti-HSP 90 antibody (Cell Signaling Technology, Beverly, MA, USA), 1:100000 dilution; anti-c-ErbB2/c-Neu (Ab-3) clone 3B5 antibody (Calbiochem, Darmstadt, Germany), 1:1000 dilution; anti-gelsolin antibody (DAKO, Glostrup; Denmark), 1:30000 dilution, and anti-Hyou1 (M01) clone 6F7 (Abnova, Heidelberg, Germany), 1:9000 dilution. Detection of alpha-tubulin, which served as a loading control, was done using the anti-alpha-tubulin (11H10) antibody (Cell Signaling Technology) at 1:45000 dilution. The appropriate secondary antibodies conjugated with horseradish peroxidase (all DAKO) were applied at 1:1000 dilution for CK7, CK17, CK19, Her-2 and vimentin; for CK5, CK8, CK18, gelsolin, HSP 90, Hyou1 and alpha-tubulin a 1:1500 dilution was used. Bands were visualized using the enhanced chemiluminescence detection system and X-ray films (both GE Healthcare, Uppsala, Sweden) in accordance to the manufacturer's instructions.

**Mass Spectrometry.** Proteins of interest were manually excised from a colloidal Coomassie stained preparative gel. Protein spots were destained with 50% methanol for 1 h and dried with acetonitrile for 30 min. In-gel reduction, alkylation with iodoacetamide, tryptic digest and extraction of the peptides was performed as described.<sup>3</sup> For MALDI-TOF analysis of tryptic peptides, 1 µl of the peptide mixture was deposited on a stainless steel sample stage (Bruker Daltonics GmbH, Bremen, Germany) and allowed to evaporate at ambient temperature. Thereafter, 1 µl of matrix solution (20 mg/ml 2,5-dihydroxybenzoic acid in 30% [v/v] aqueous acetonitrile) was added on the dried peptides and allowed to dry out. Tryptic peptide mass fingerprints were obtained on a Reflex IV MALDI-TOF mass spectrometer (Bruker) in the positive ion reflector mode. The ion acceleration voltage was 20 kV. Raw data were generated using the software FlexControl 2.4 and further processed by FlexAnalysis 2.4 (both software Bruker). The mass spectra were internally calibrated using the trypsin autoproteolysis peaks preferentially using the signals at 805.41 Da and 2163.05 Da and all known contaminant signals were excluded. For analysis of the MALDI spectra the following parameters were used: the signal-to-noise threshold was set greater 10 and the resolution to greater 5000 with a mass accuracy of 30 ppm. Proteins were searched using the non-redundant UniProtKB/Swiss-Prot database and Mascot Peptide Mass Fingerprint (www.matrixscience.com). The following parameters for protein identification were used: The species

was limited to *homo sapiens*, one missed cleavage site for trypsin was allowed, carbamidomethyl cysteine was set as fixed modification, and oxidation of methionine was set as variable modification. The deviation of experimental peptide mass values was limited to 80 ppm. The probability scores of the search results were higher than the score fixed as significant with a significance threshold ( $p < 0.05$ ).

For protein identification using nanoelectrospray mass spectrometry, experiments were carried out using a quadrupole time-of-flight mass spectrometer (Q-ToF-2 electrospray mass spectrometer, Waters, Saint-Quentin, France) in the positive ion mode (ESI(+)). In-gel reduction, alkylation with iodoacetamide, tryptic digest and extraction of the peptides was performed as described for MALDI-TOF MS. Tryptic digest was carried out using modified porcine trypsin at 10 ng/ $\mu$ l (Promega, Mannheim, Germany). Prior to nanoelectrospray mass spectrometry experiments, peptides were purified with ZipTipC18, Size P10 (Millipore; Woburn, USA) according to the manufacturer's instructions. Raw data were acquired and analyzed using the software MassLynx 3.5 (Micromass, Manchester, UK). The capillary tip was set to a potential of 0.78 kV and the cone voltage was 40 V. For collision-induced dissociation (CID) experiments, ions were selected within a precursor mass window of  $\pm 1$  Da in the quadrupole analyzer and fragmented in the collision cell using a collision gas (Ar) and collision energies of 27 to 35 eV. The resolution of the peaks was more than 4000 with a signal-to-noise threshold of more than 10. For database research the NCBI nr database and Mascot MS/MS Ions Search ([www.matrixscience.com](http://www.matrixscience.com)) was used. The search parameters (if applicable) were identical as for MALDI-TOF except the following: The precursor mass tolerance was limited to 1.2 Da, and the MS/MS fragment tolerance was 0.6 Da and no missed cleavage was allowed. The probability scores of the search results for each protein were at least for two peptides higher than the score fixed as significant with a significance threshold ( $p < 0.05$ ) indicating identity or extensive homology.

**Molecular Size Standard used in 2-DE.** For 2-DE experiments, the molecular size standard peqGOLD protein-marker V was applied for an initial estimation of the protein masses. The molecular masses specified here for a more direct estimation are the theoretical masses of the unmodified proteins identified by peptide mass fingerprints (PMF) from the gels. For the pH gradient 4-7, the following

proteins were selected as size standard: vinculin (123 kDa), gelsolin (82 kDa), HSP60 (58 kDa), actin (41 kDa), inorganic pyrophosphatase (32 kDa) and peroxiredoxin2 (21 kDa). For the pH gradient 6-11 the following proteins were selected as size standard: elongation factor 2 (95 kDa), heterogeneous nuclear ribonucleoprotein M (77 kDa), cytokeratin 5 (62 kDa), annexin A2 (38 kDa) and GTP-binding nuclear protein Ran (24 kDa).

**Immunocytochemical double staining of bone marrow samples.** Bone marrow from breast cancer patients was aspirated at the University Medical Center Hamburg-Eppendorf at the time of primary surgery. Written informed consent was obtained beforehand from all patients. For immuno-double staining, slides with  $7 \times 10^5$  mono-nuclear cells isolated from bone marrow<sup>4</sup> of three different breast cancer patients were fixed for 10 min with Fixation Solution B (Epimet, AS Diagnostik, Germany), washed with PBS three times, and blocked for unspecific binding for 20 min using Proteinblock (Dako). This was followed by a 45 min incubation with CK5 antibody diluted 1:100 in Dako Antibody Diluent. Subsequently slides were washed again three times with PBS, and Alexa 488 rabbit anti- mouse secondary antibody was applied for 45 min diluted 1:200 in Dako Antibody Diluent (with Background reducing components, #I2270). After another washing step, a protein block followed as described above to prevent any interference between primary and secondary antibody, and A45-Cy3 at a dilution of 1:300 was added for 45 min. After another washing step, slides were covered with Vectashield Mounting Medium containing Dapi (Vector Laboratories, Burlingame, U.S.A.). For CK5 detection, the anti-cytokeratin 5 [XM26] antibody (abcam) was used. The A45-B/B3 (AS Diagnostics, Hückeswagen, Germany) is a mouse IgG1 antibody reactive with a common epitope on several cytokeratins including CK8, CK18 and CK19<sup>5</sup>. Slides were evaluated manually.

## Supplementary tables

**Supplementary Table 1.** Detailed information of proteins identified by MALDI-TOF MS tryptic peptide mass fingerprint (A) and Q-TOF-MS/MS (B). Spot numbers refer to designated protein spots in Fig. 3 and 4 of the main text.

Supplementary Table 1A.

| Spot no. | Swiss Prot Acc no. | Protein name                               | Observed Mass [kDa] | Observed pI | Theor. Mass [kDa] | Theor. pI | MASCOT score | Expect MASCOT | Number of mass values searched | sequence coverage (%) / matched peptides |
|----------|--------------------|--------------------------------------------|---------------------|-------------|-------------------|-----------|--------------|---------------|--------------------------------|------------------------------------------|
| 1        | P08238             | Heat shock protein HSP 90-beta             | 85                  | 4.6         | 83.0              | 4.97      | 139          | 2.6e-10       | 36                             | 27/19                                    |
| 2        | P68363             | Tubulin alpha-ubiquitous chain             | 55                  | 5.0         | 50.2              | 4.94      | 141          | 1.6e-10       | 21                             | 38/12                                    |
| 3        | P06396             | Gelsolin                                   | 85                  | 5.9         | 82.9              | 5.72      | 116          | 5.1e-08       | 21                             | 13/12                                    |
| 4        | P18206             | Vinculin                                   | 120                 | 6.2         | 123.6             | 5.51      | 283          | 1e-24         | 55                             | 31/37                                    |
| 5        | P15311             | Ezrin (Cyto villin)                        | 65                  | 6.4         | 69.2              | 5.95      | 200          | 2e-16         | 34                             | 29/21                                    |
| 6        | P08729             | Keratin, type II cytoskeletal 7            | 50                  | 5.5         | 51.2              | 5.50      | 128          | 3.2e-09       | 25                             | 30/12                                    |
| 7        | P05787             | Keratin, type II cytoskeletal 8            | 50                  | 5.6         | 53.5              | 5.52      | 159          | 2.6e-12       | 23                             | 30/16                                    |
| 8        | Q04695             | Keratin, type I cytoskeletal 17            | 45                  | 5.0         | 47.9              | 4.97      | 118          | 3.2e-08       | 23                             | 25/10                                    |
| 9        | P05783             | Keratin, type I cytoskeletal 18            | 45                  | 5.4         | 47.9              | 5.34      | 151          | 1.6e-11       | 44                             | 38/17                                    |
| 10       | P08727             | Keratin, type I cytoskeletal 19            | 40                  | 5.0         | 44.1              | 5.05      | 251          | 1.6e-21       | 23                             | 38/18                                    |
| 11       | P31947             | 14-3-3 protein sigma (Stratiffin)          | 25                  | 4.8         | 27.8              | 4.68      | 134          | 8.1e-10       | 24                             | 35/13                                    |
| 12       | P13639             | Elongation factor 2                        | 90                  | 7.1         | 95.1              | 6.42      | 103          | 1e-06         | 13                             | 18/9                                     |
| 13       | P13647             | Keratin, type II cytoskeletal 5            | 55                  | 7.9         | 62.4              | 8.14      | 138          | 3.2e-10       | 34                             | 24/15                                    |
| 14       | P25705             | ATP synthase subunit alpha                 | 50                  | 8.3         | 55.2              | 8.28      | 139          | 2.6e-10       | 15                             | 24/10                                    |
| 15       | P07355             | Annexin A2                                 | 35                  | 7.8         | 38.5              | 7.56      | 193          | 1e-15         | 27                             | 45/18                                    |
| 16       | P68104             | Elongation factor 1-alpha 1 (EF-1-alpha-1) | 45                  | 9.4         | 50.1              | 9.1       | 89           | 2.5e-05       | 19                             | 26/10                                    |
| 17       | P52272             | Heterogeneous nuclear ribonucleoprotein M  | 70                  | 9.1         | 77.3              | 8.85      | 63           | 0.0095        | 18                             | 15/12                                    |

Supplementary Table 1B.

| Spot no. | Swiss Prot Acc no.                                                                                                                                     | Protein name                   |           | Theor. Mass [kDa]/ Observed Mass [kDa] |                      | Theor. pI / Observed pI |                         |
|----------|--------------------------------------------------------------------------------------------------------------------------------------------------------|--------------------------------|-----------|----------------------------------------|----------------------|-------------------------|-------------------------|
| 18       | Q9Y4L1                                                                                                                                                 | Hypoxia up-regulated protein 1 |           | 107.6 / 140                            |                      | 5.07 / 5.6              |                         |
|          | precursor ion mass [m/z] and charge                                                                                                                    | Mr(expt)                       | Mr(calc)  | Delta                                  | individual ion score | Expect                  | Peptide                 |
|          | 762.0039 [2+]                                                                                                                                          | 1521.9933                      | 1520.8239 | 1.1694                                 | 28                   | 0.04                    | R.DAVVYPILVE FTR.E      |
|          | Individual ions scores > 19 indicate peptides with significant homology. Individual ions scores > 27 indicate identity or extensive homology (p<0.05). |                                |           |                                        |                      |                         |                         |
|          | precursor ion mass [m/z] and charge                                                                                                                    | Mr(expt)                       | Mr(calc)  | Delta                                  | individual ion score | Expect                  | Peptide                 |
|          | 829.1039 [2+]                                                                                                                                          | 1656.1933                      | 1655.7501 | 0.4432                                 | 49                   | 0.0003                  | R.VEFEELCADL FER.V      |
|          | Individual ions scores > 20 indicate peptides with significant homology. Individual ions scores > 27 indicate identity or extensive homology (p<0.05). |                                |           |                                        |                      |                         |                         |
|          | precursor ion mass [m/z] and charge                                                                                                                    | Mr(expt)                       | Mr(calc)  | Delta                                  | individual ion score | Expect                  | Peptide                 |
|          | 869.0039 [2+]                                                                                                                                          | 1735.9933                      | 1734.8708 | 1.114                                  | 29                   | 0.046                   | K.LGNTISSLFGG GTTPDAK.E |
|          | Individual ions scores > 22 indicate peptides with significant homology. Individual ions scores > 28 indicate identity or extensive homology (p<0.05)  |                                |           |                                        |                      |                         |                         |
|          | precursor ion mass [m/z] and charge                                                                                                                    | Mr(expt)                       | Mr(calc)  | Delta                                  | individual ion score | Expect                  | Peptide                 |
|          | 1047.994 [2+]                                                                                                                                          | 2093.9733                      | 2094.1109 | -0.137                                 | 85                   | $3.9 \times 10^{-08}$   | K.VLQLINDNTA TALSYGVR.R |
|          | Individual ions scores > 24 indicate identity or extensive homology (p<0.05).                                                                          |                                |           |                                        |                      |                         |                         |

|          |                                                                                                                                                        |              |           |                                           |                      |                         |                              |
|----------|--------------------------------------------------------------------------------------------------------------------------------------------------------|--------------|-----------|-------------------------------------------|----------------------|-------------------------|------------------------------|
|          | precursor ion mass [m/z] and charge                                                                                                                    | Mr(expt)     | Mr(calc)  | Delta                                     | individual ion score | Expect                  | Peptide                      |
|          | 1171.994 [2+]                                                                                                                                          | 2341.9733    | 2341.1060 | 0.8672                                    | 27                   | 0.022                   | R.VESVFETLVE<br>DSAEESTLTK.L |
|          | Individual ions scores > 23 indicate identity or extensive homology (p<0.05).                                                                          |              |           |                                           |                      |                         |                              |
| Spot no. | Swiss Prot Acc no.                                                                                                                                     | Protein name |           | Theor. Mass [kDa]/<br>Observed Mass [kDa] |                      | Theor. pI / Observed pI |                              |
| 19 a)    | P08670                                                                                                                                                 | Vimentin     |           | 53.5 / 45                                 |                      | 5.06 / 4.9              |                              |
|          | precursor ion mass [m/z] and charge                                                                                                                    | Mr(expt)     | Mr(calc)  | Delta                                     | individual ion score | Expect                  | Peptide                      |
|          | 648.8039 [2+]                                                                                                                                          | 1295.5933    | 1294.6591 | 0.9342                                    | 27                   | 0.093                   | K.MALDIEIATY<br>R.K          |
|          | Individual ions scores > 27 indicate peptides with significant homology. Individual ions scores > 30 indicate identity or extensive homology (p<0.05). |              |           |                                           |                      |                         |                              |
|          | precursor ion mass [m/z] and charge                                                                                                                    | Mr(expt)     | Mr(calc)  | Delta                                     | individual ion score | Expect                  | Peptide                      |
|          | 785.9039 [2+]                                                                                                                                          | 1569.7933    | 1569.8878 | -0.094                                    | 64                   | $1.8 \times 10^{-05}$   | R.ISLPLPNFSSL<br>NLR.E       |
|          | Individual ions scores > 20 indicate peptides with significant homology. Individual ions scores > 29 indicate identity or extensive homology (p<0.05). |              |           |                                           |                      |                         |                              |
|          | precursor ion mass [m/z] and charge                                                                                                                    | Mr(expt)     | Mr(calc)  | Delta                                     | individual ion score | Expect                  | Peptide                      |
|          | 1063.503 [2+]                                                                                                                                          | 2124.9933    | 2125.0579 | -0.064                                    | 121                  | $2.3 \times 10^{-11}$   | R.LLQDSVDFSL<br>ADAINTEFK.N  |
|          | Individual ions scores > 25 indicate peptides with significant homology. Individual ions scores > 27 indicate identity or extensive homology (p<0.05). |              |           |                                           |                      |                         |                              |
|          | precursor ion mass [m/z] and charge                                                                                                                    | Mr(expt)     | Mr(calc)  | Delta                                     | individual ion score | Expect                  | Peptide                      |

|             |                                                                                                                                                        |                                   |           |                                              |                         |                         |                                                |
|-------------|--------------------------------------------------------------------------------------------------------------------------------------------------------|-----------------------------------|-----------|----------------------------------------------|-------------------------|-------------------------|------------------------------------------------|
|             | 1093.904<br>[2+]                                                                                                                                       | 2185.7933                         | 2185.9586 | -0.165                                       | 121                     | $1.2 \times 10^{-11}$   | R.EMEENFAVEA<br>ANYQDTIGR.L                    |
|             | Individual ions scores > 22 indicate peptides with significant homology. Individual ions scores > 24 indicate identity or extensive homology (p<0.05). |                                   |           |                                              |                         |                         |                                                |
|             | precursor<br>ion mass<br>[m/z] and<br>charge                                                                                                           | Mr(expt)                          | Mr(calc)  | Delta                                        | individual<br>ion score | Expect                  | Peptide                                        |
|             | 1101.904<br>[2+]                                                                                                                                       | 2201.7933                         | 2201.9535 | -0.160                                       | 153                     | $8.8 \times 10^{-15}$   | R.EMEENFAVEA<br>ANYQDTIGR.L +<br>Oxidation (M) |
|             | Individual ions scores > 23 indicate peptides with significant homology. Individual ions scores > 25 indicate identity or extensive homology (p<0.05). |                                   |           |                                              |                         |                         |                                                |
| Spot<br>no. | Swiss Prot<br>Acc no.                                                                                                                                  | Protein name                      |           | Theor. Mass [kDa]/<br>Observed Mass<br>[kDa] |                         | Theor. pI / Observed pI |                                                |
| 19 b)       | P68363                                                                                                                                                 | Tubulin alpha-ubiquitous<br>chain |           | 50.2 / 55                                    |                         | 4.94 / 5.0              |                                                |
|             | precursor<br>ion mass<br>[m/z] and<br>charge                                                                                                           | Mr(expt)                          | Mr(calc)  | Delta                                        | individual<br>ion score | Expect                  | Peptide                                        |
|             | 912.9039<br>[2+]                                                                                                                                       | 1823.7933                         | 1823.9782 | -0.185                                       | 36                      | 0.01                    | K.VGINYQPPTV<br>VPGDLAK.V                      |
|             | Individual ions scores > 22 indicate peptides with significant homology. Individual ions scores > 28 indicate identity or extensive homology (p<0.05). |                                   |           |                                              |                         |                         |                                                |
|             | precursor<br>ion mass<br>[m/z] and<br>charge                                                                                                           | Mr(expt)                          | Mr(calc)  | Delta                                        | individual<br>ion score | Expect                  | Peptide                                        |
|             | 940.9039<br>[2+]                                                                                                                                       | 1879.7933                         | 1879.8920 | -0.099                                       | 43                      | 0.0019                  | R.AVCMLSNTTA<br>IAEAWAR.L +<br>Oxidation (M)   |
|             | Individual ions scores > 19 indicate peptides with significant homology. Individual ions scores > 28 indicate identity or extensive homology (p<0.05). |                                   |           |                                              |                         |                         |                                                |
|             | precursor<br>ion mass<br>[m/z] and<br>charge                                                                                                           | Mr(expt)                          | Mr(calc)  | Delta                                        | individual<br>ion score | Expect                  | Peptide                                        |



|                                                                                                                                                        | 1004.904<br>[2+]                    | 2007.7933                                       | 2006.8858 | 0.9075                                    | 32                   | 0.01                    | K.TIGGGDDSFN<br>TFFSETGAGK.H        |
|--------------------------------------------------------------------------------------------------------------------------------------------------------|-------------------------------------|-------------------------------------------------|-----------|-------------------------------------------|----------------------|-------------------------|-------------------------------------|
| Individual ions scores > 25 indicate identity or extensive homology (p<0.05).                                                                          |                                     |                                                 |           |                                           |                      |                         |                                     |
| Spot no.                                                                                                                                               | Swiss Prot Acc no.                  | Name                                            |           | Theor. Mass [kDa]/<br>Observed Mass [kDa] |                      | Theor. pI / Observed pI |                                     |
| 20                                                                                                                                                     | P23246                              | Splicing factor, proline-<br>and glutamine-rich |           | 76.1 / 85                                 |                      | 9.45 / 9.7              |                                     |
|                                                                                                                                                        | precursor ion mass [m/z] and charge | Mr(expt)                                        | Mr(calc)  | Delta                                     | individual ion score | Expect                  | Peptide                             |
|                                                                                                                                                        | 572.8039<br>[2+]                    | 1143.5933                                       | 1142.6196 | 0.9736                                    | 28                   | 0.071                   | R.FATHAAALSV<br>R.N                 |
| Individual ions scores > 18 indicate peptides with significant homology. Individual ions scores > 29 indicate identity or extensive homology (p<0.05). |                                     |                                                 |           |                                           |                      |                         |                                     |
|                                                                                                                                                        | precursor ion mass [m/z] and charge | Mr(expt)                                        | Mr(calc)  | Delta                                     | individual ion score | Expect                  | Peptide                             |
|                                                                                                                                                        | 905.0039<br>[2+]                    | 1807.9933                                       | 1806.9040 | 1.0893                                    | 38                   | 0.0067                  | R.LFVGNLPADIT<br>EDEFK.R            |
| Individual ions scores > 21 indicate peptides with significant homology. Individual ions scores > 28 indicate identity or extensive homology (p<0.05). |                                     |                                                 |           |                                           |                      |                         |                                     |
|                                                                                                                                                        | precursor ion mass [m/z] and charge | Mr(expt)                                        | Mr(calc)  | Delta                                     | individual ion score | Expect                  | Peptide                             |
|                                                                                                                                                        | 1320.094<br>[2+]                    | 2638.1733                                       | 2638.2915 | -0.118                                    | 36                   | 0.0021                  | R.NLSPYVSNEL<br>LEEAFSQFGPIE<br>R.A |
| Individual ions scores > 22 indicate identity or extensive homology (p<0.05).                                                                          |                                     |                                                 |           |                                           |                      |                         |                                     |

**Supplementary Table 2.** Peak lists of proteins identified by MALDI-TOF MS tryptic peptide mass fingerprint. Spot numbers refer to designated protein spots in Fig. 3 and 4 of the main text.

| Protein name and Swiss Prot Acc no.     | observed peptide masses (m/z)(Da) | Protein name and Swiss Prot Acc no. | observed peptide masses (m/z)(Da) | Protein name and Swiss Prot Acc no. | observed peptide masses (m/z)(Da) |
|-----------------------------------------|-----------------------------------|-------------------------------------|-----------------------------------|-------------------------------------|-----------------------------------|
| Heat shock protein HSP 90-beta (P08238) | 1194.6932                         | Tubulin alpha-ubiquitous (P68363)   | 2007.893                          | Gelsolin (P06396)                   | 1254.6994                         |
|                                         | 1242.7661                         |                                     | 2191.0528                         |                                     | 998.5336                          |
|                                         | 951.4725                          |                                     | 1701.923                          |                                     | 1722.9643                         |
|                                         | 1311.6084                         |                                     | 1718.9054                         |                                     | 850.4919                          |
|                                         | 1151.6362                         |                                     | 1487.8824                         |                                     | 1275.7247                         |
|                                         | 901.5239                          |                                     | 2409.2106                         |                                     | 1320.671                          |
|                                         | 1847.6507                         |                                     | 1756.9753                         |                                     | 847.425                           |
|                                         | 1527.6874                         |                                     | 1584.7497                         |                                     | 882.5092                          |
|                                         | 1348.6909                         |                                     | 1824.9951                         |                                     | 1074.5246                         |
|                                         | 829.5015                          |                                     | 1864.9223                         |                                     | 887.4741                          |
|                                         | 1236.6504                         |                                     | 1880.9109                         |                                     | 839.415                           |
|                                         | 1513.7824                         |                                     | 2346.0234                         |                                     | 1078.5444                         |
|                                         | 891.4403                          |                                     |                                   |                                     |                                   |
|                                         | 886.5234                          |                                     |                                   |                                     |                                   |
|                                         | 1160.6302                         |                                     |                                   |                                     |                                   |
|                                         | 1249.6462                         |                                     |                                   |                                     |                                   |
|                                         | 1009.5399                         |                                     |                                   |                                     |                                   |
|                                         | 1376.6355                         |                                     |                                   |                                     |                                   |
|                                         | 1782.8095                         |                                     |                                   |                                     |                                   |

Supplementary Table 2 (continued).

| Protein name and Swiss Prot Acc no. | observed peptide masses (m/z)(Da) | Protein name and Swiss Prot Acc no. | observed peptide masses (m/z)(Da) | Protein name and Swiss Prot Acc no.      | observed peptide masses (m/z)(Da) |
|-------------------------------------|-----------------------------------|-------------------------------------|-----------------------------------|------------------------------------------|-----------------------------------|
| Vinculin (P18206)                   | 1560.7021                         | Ezrin (P15311)                      | 823.5308                          | Keratin, type II cytoskeletal 7 (P08729) | 2246.1447                         |
|                                     | 1090.6128                         |                                     | 976.598                           |                                          | 1104.6185                         |
|                                     | 934.4857                          |                                     | 848.4439                          |                                          | 2449.233                          |
|                                     | 938.4739                          |                                     | 894.5828                          |                                          | 1082.613                          |

|           |           |           |
|-----------|-----------|-----------|
| 1305.6404 | 1236.6289 | 906.5043  |
| 1001.5491 | 898.4474  | 1045.5856 |
| 1191.6048 | 1175.6462 | 1773.0599 |
| 1748.7407 | 1104.6228 | 1220.6921 |
| 1470.6499 | 965.5754  | 1348.8011 |
| 1493.6306 | 959.5575  | 1441.8478 |
| 1509.6315 | 1087.7241 | 1385.7926 |
| 1457.7798 | 1310.7215 | 1277.7836 |
| 1037.5124 | 1182.6325 |           |
| 1345.5996 | 924.4559  |           |
| 916.4515  | 1002.5694 |           |
| 1105.6291 | 987.5663  |           |
| 1314.7074 | 1416.6969 |           |
| 1230.5968 | 874.4896  |           |
| 838.4261  | 1651.8455 |           |
| 1183.5801 | 1070.6574 |           |
| 1484.7416 | 1445.8354 |           |
| 930.4418  |           |           |
| 1173.6397 |           |           |
| 1074.5258 |           |           |
| 1170.6531 |           |           |
| 1752.6582 |           |           |
| 1145.5918 |           |           |
| 1269.679  |           |           |
| 944.4625  |           |           |
| 1550.6963 |           |           |
| 1566.6231 |           |           |
| 868.4867  |           |           |
| 1200.5697 |           |           |
| 1132.5866 |           |           |
| 1303.6916 |           |           |
| 880.4694  |           |           |
| 822.3902  |           |           |

Supplementary Table 2 (continued).

| Protein name and Swiss Prot Acc no.    | observed peptide masses (m/z)(Da) | Protein name and Swiss Prot Acc no.   | observed peptide masses (m/z)(Da) | Protein name and Swiss Prot Acc no.   | observed peptide masses (m/z)(Da) |
|----------------------------------------|-----------------------------------|---------------------------------------|-----------------------------------|---------------------------------------|-----------------------------------|
| Keratin, type II cytoskeletal (P05787) | 1352.7264                         | Keratin, type I cytoskeletal (Q04695) | 1886.915                          | Keratin, type I cytoskeletal (P05783) | 975.4931                          |
|                                        | 1496.7385                         |                                       | 1034.5118                         |                                       | 1092.6794                         |
|                                        | 1797.8276                         |                                       | 1064.56                           |                                       | 848.4298                          |
|                                        | 1813.8129                         |                                       | 1036.5345                         |                                       | 1004.5352                         |
|                                        | 1419.7393                         |                                       | 994.445                           |                                       | 924.5747                          |
|                                        | 2109.0066                         |                                       | 3023.6008                         |                                       | 982.5018                          |
|                                        | 2125.0012                         |                                       | 2068.1679                         |                                       | 2059.1334                         |
|                                        | 1320.6294                         |                                       | 807.4039                          |                                       | 1041.6561                         |
|                                        | 1079.5239                         |                                       | 1222.6574                         |                                       | 807.4222                          |
|                                        | 1428.6592                         |                                       | 1342.7605                         |                                       | 1255.7256                         |
|                                        | 1137.5475                         |                                       |                                   |                                       | 1267.7196                         |
|                                        | 1341.7315                         |                                       |                                   |                                       | 1884.0915                         |
|                                        | 1344.6677                         |                                       |                                   |                                       | 1680.9658                         |
|                                        | 1129.6201                         |                                       |                                   |                                       | 965.5131                          |
|                                        | 1277.7003                         |                                       |                                   |                                       | 1878.0518                         |
|                                        | 1405.7959                         |                                       |                                   |                                       | 1473.8775                         |
|                                        |                                   |                                       |                                   |                                       | 1292.7736                         |

Supplementary Table 2 (continued).

| Protein name and Swiss Prot Acc no.   | observed peptide masses (m/z)(Da) | Protein name and Swiss Prot Acc no.       | observed peptide masses (m/z)(Da) | Protein name and Swiss Prot Acc no. | observed peptide masses (m/z)(Da) |
|---------------------------------------|-----------------------------------|-------------------------------------------|-----------------------------------|-------------------------------------|-----------------------------------|
| Keratin, type I cytoskeletal (P08727) | 1554.7681                         | 14-3-3 protein sigma (Stratifin) (P31947) | 816.4554                          | Elongation factor 2 (P13639)        | 2220.1428                         |
|                                       | 850.4667                          |                                           | 1918.8474                         |                                     | 1849.0258                         |
|                                       | 1120.5567                         |                                           | 1934.8114                         |                                     | 2759.3167                         |
|                                       | 1064.6224                         |                                           | 1137.4582                         |                                     | 2143.0688                         |
|                                       | 1008.563                          |                                           | 1592.7323                         |                                     | 1742.8929                         |
|                                       | 1073.6155                         |                                           | 1546.6947                         |                                     | 1534.8225                         |
|                                       | 1041.6359                         |                                           | 928.4817                          |                                     | 3005.3802                         |

|           |           |           |
|-----------|-----------|-----------|
| 807.3962  | 948.4473  | 1799.9285 |
| 1222.6684 | 1386.6137 | 1444.7617 |
| 993.5255  | 1198.6392 |           |
| 1029.6114 | 1054.556  |           |
| 1227.6184 | 1070.5423 |           |
| 1370.6235 | 1205.6592 |           |
| 1498.7019 |           |           |
| 1210.6345 |           |           |
| 1082.5303 |           |           |
| 1501.7178 |           |           |
| 1389.7133 |           |           |

Supplementary Table 2 (continued).

| Protein name and<br>Swiss Prot Acc no.         | observed peptide<br>masses (m/z)(Da) | Protein name and<br>Swiss Prot Acc<br>no. | observed peptide<br>masses (m/z)(Da) | Protein name and<br>Swiss Prot Acc<br>no. | observed peptide<br>masses (m/z)(Da) |
|------------------------------------------------|--------------------------------------|-------------------------------------------|--------------------------------------|-------------------------------------------|--------------------------------------|
| Keratin, type II<br>cytoskeletal 5<br>(P13647) | 865.3866                             | ATP synthase<br>subunit alpha<br>(P25705) | 1575.757                             | Annexin A2<br>(P07355)                    | 1844.8678                            |
|                                                | 2257.002                             |                                           | 1667.7902                            |                                           | 1086.4324                            |
|                                                | 1410.6786                            |                                           | 1624.8875                            |                                           | 2154.9842                            |
|                                                | 938.4911                             |                                           | 1710.8886                            |                                           | 1542.8111                            |
|                                                | 1082.5499                            |                                           | 1120.6792                            |                                           | 1777.8276                            |
|                                                | 1462.7663                            |                                           | 1229.6443                            |                                           | 1244.5766                            |
|                                                | 1759.9373                            |                                           | 1287.653                             |                                           | 1811.8389                            |
|                                                | 1203.5985                            |                                           | 1553.7305                            |                                           | 2064.9207                            |
|                                                | 1426.6799                            |                                           | 1438.8145                            |                                           | 1908.8436                            |
|                                                | 2418.0586                            |                                           | 1310.6121                            |                                           | 1632.7535                            |
|                                                | 1537.7839                            |                                           |                                      |                                           | 1035.4858                            |
|                                                | 1553.761                             |                                           |                                      |                                           | 1051.4721                            |
|                                                | 1133.4976                            |                                           |                                      |                                           | 1460.6214                            |
|                                                | 1439.6797                            |                                           |                                      |                                           | 1476.6166                            |
|                                                | 2392.0928                            |                                           |                                      |                                           | 1588.7215                            |
|                                                |                                      |                                           |                                      |                                           | 1604.7285                            |
|                                                |                                      |                                           |                                      |                                           | 1421.6491                            |

Supplementary Table 2 (continued).

| Protein name and Swiss<br>Prot Acc no.  | observed peptide masses<br>(m/z)(Da) | Protein name and Swiss Prot Acc no.                   | observed peptide masses<br>(m/z)(Da) |
|-----------------------------------------|--------------------------------------|-------------------------------------------------------|--------------------------------------|
| Elongation factor 1-alpha<br>1 (P68104) | 1588.8016                            | Heterogeneous nuclear<br>ribonucleoprotein M (P52272) | 1629.7181                            |
|                                         | 1120.5638                            |                                                       | 1125.4458                            |
|                                         | 1404.6662                            |                                                       | 1141.4965                            |
|                                         | 1314.6794                            |                                                       | 1157.4901                            |
|                                         | 1600.8126                            |                                                       | 1556.7795                            |
|                                         | 2515.3498                            |                                                       | 1572.7658                            |
|                                         | 2531.3185                            |                                                       | 1427.6594                            |
|                                         | 3011.3004                            |                                                       | 1443.6528                            |
|                                         | 3027.2832                            |                                                       | 1399.562                             |
|                                         | 910.4295                             |                                                       | 2034.9762                            |
|                                         |                                      |                                                       | 1021.561                             |
|                                         |                                      |                                                       | 1663.799                             |

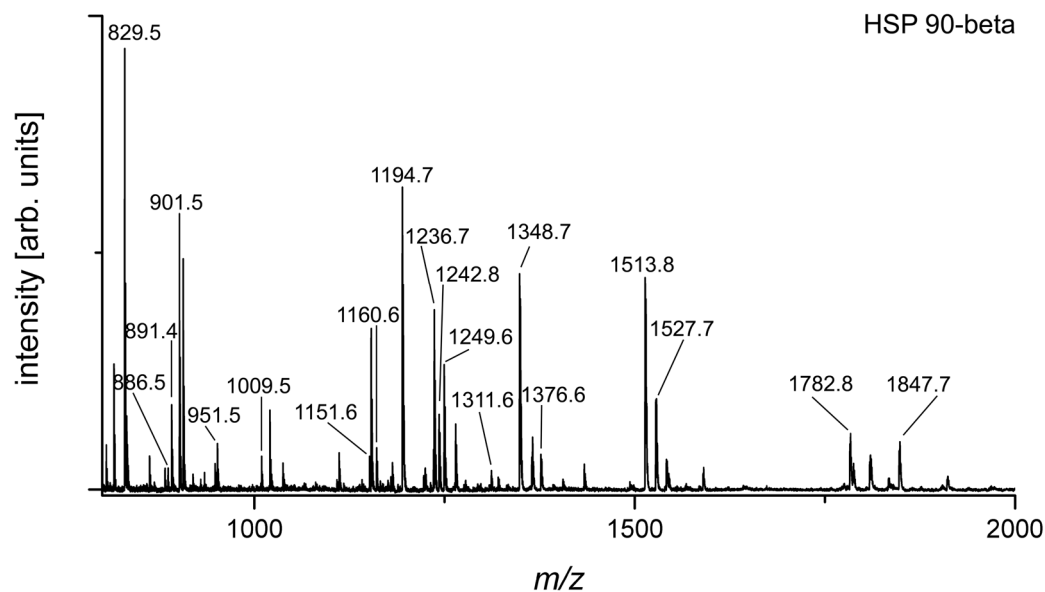

**Supplementary Figure 1.** MALDI-TOF MS tryptic peptide mass fingerprint of Heat shock protein HSP 90-beta (Swiss Prot Acc no. P08238). Spot numbers refer to designated protein spots in Fig. 3 and 4 of the main text.

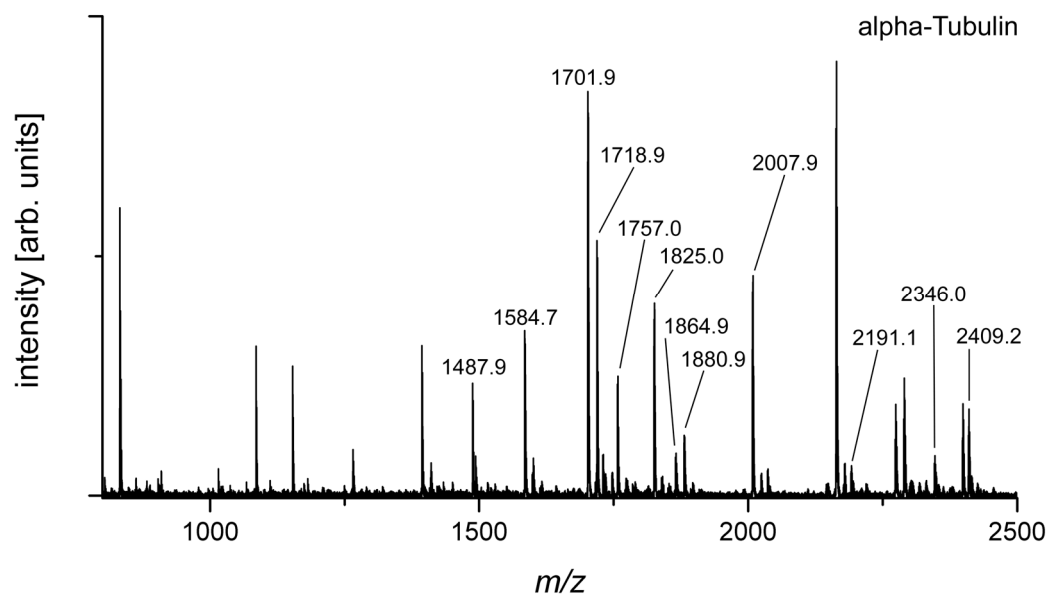

**Supplementary Figure 2.** MALDI-TOF MS tryptic peptide mass fingerprint of Tubulin alpha-chain (Swiss Prot Acc no. P68363). Spot numbers refer to designated protein spots in Fig. 3 and 4 of the main text.

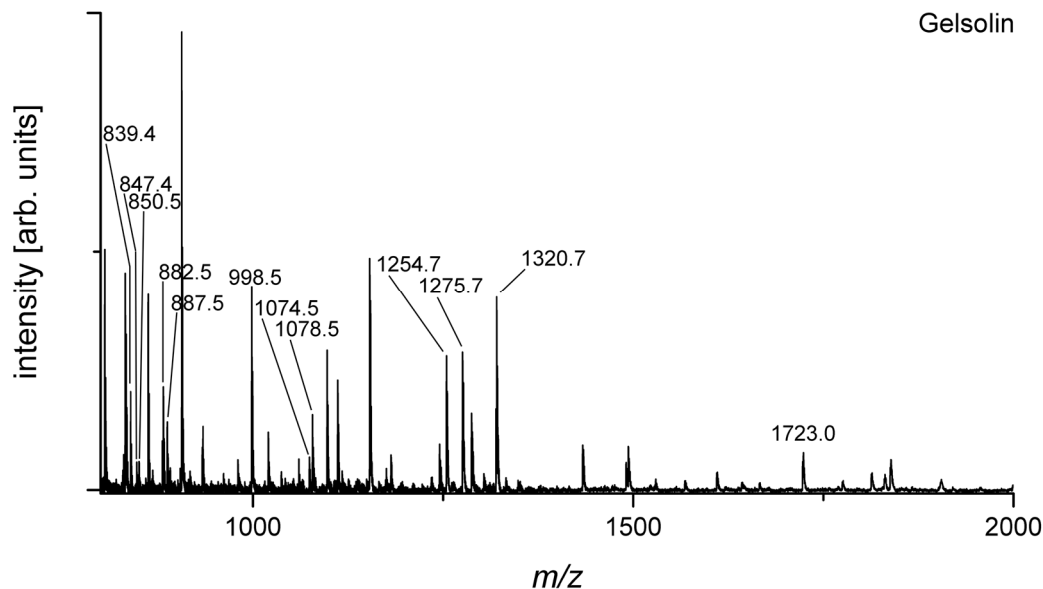

**Supplementary Figure 3.** MALDI-TOF MS tryptic peptide mass fingerprint of Gelsolin (Swiss Prot Acc no. P06396). Spot numbers refer to designated protein spots in Fig. 3 and 4 of the main text.

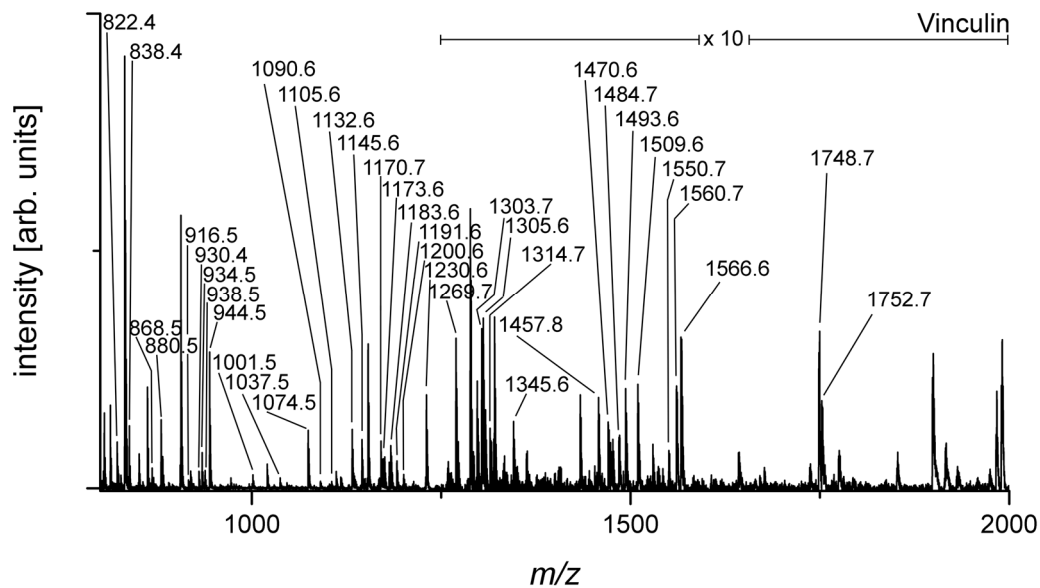

**Supplementary Figure 4.** MALDI-TOF MS tryptic peptide mass fingerprint of Vinculin (Swiss Prot Acc no. P18206). Spot numbers refer to designated protein spots in Fig. 3 and 4 of the main text.



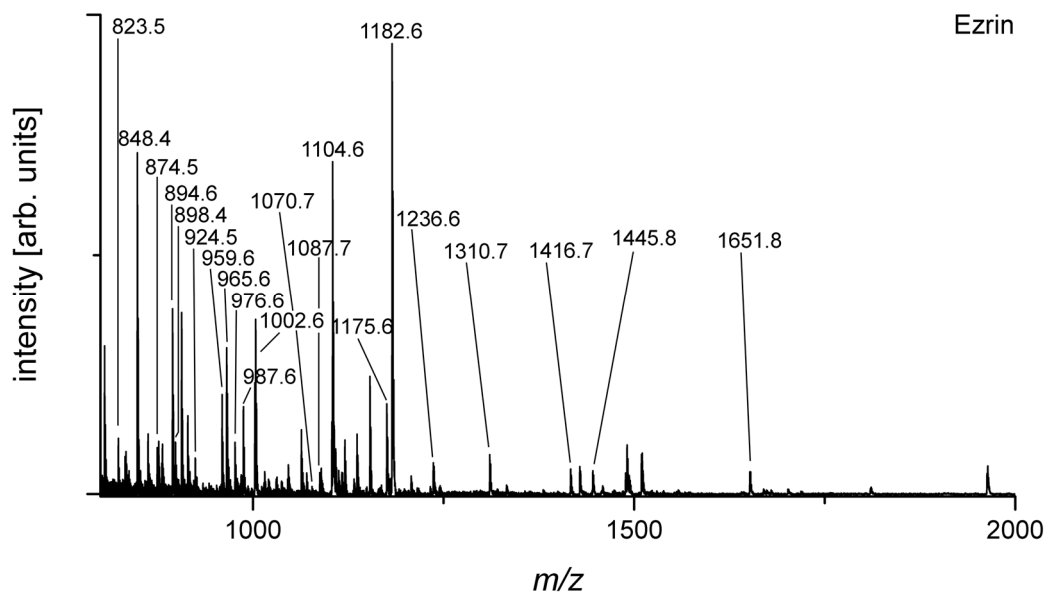

**Supplementary Figure 5.** MALDI-TOF MS tryptic peptide mass fingerprint of Ezrin (Cytovillin) (Swiss Prot Acc no. P15311). Spot numbers refer to designated protein spots in Fig. 3 and 4 of the main text.

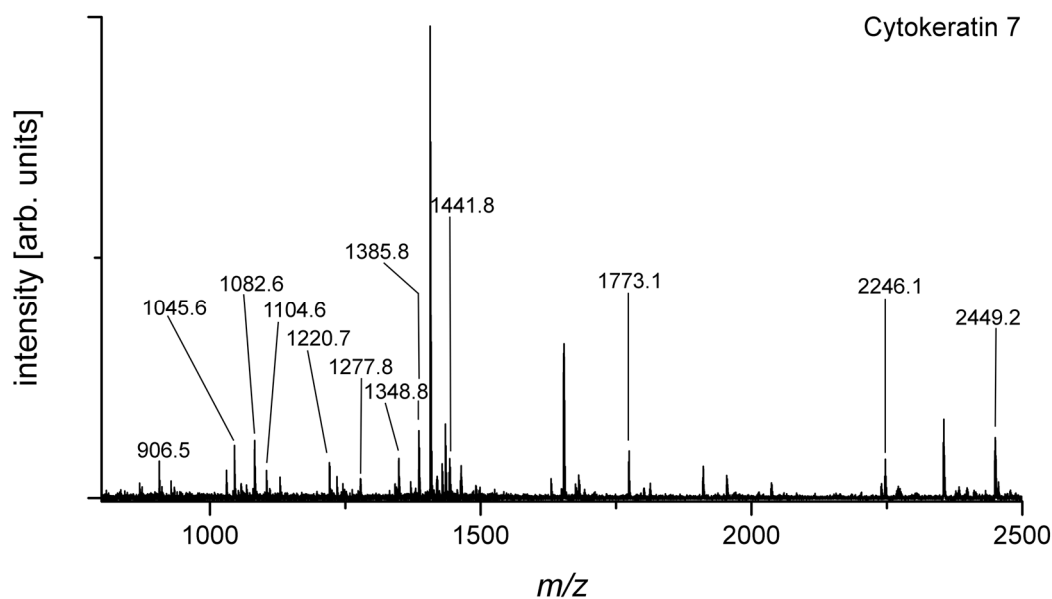

**Supplementary Figure 6.** MALDI-TOF MS tryptic peptide mass fingerprint of Keratin, type II cytoskeletal 7 (Swiss Prot Acc no. P08729). Spot numbers refer to designated protein spots in Fig. 3 and 4 of the main text.

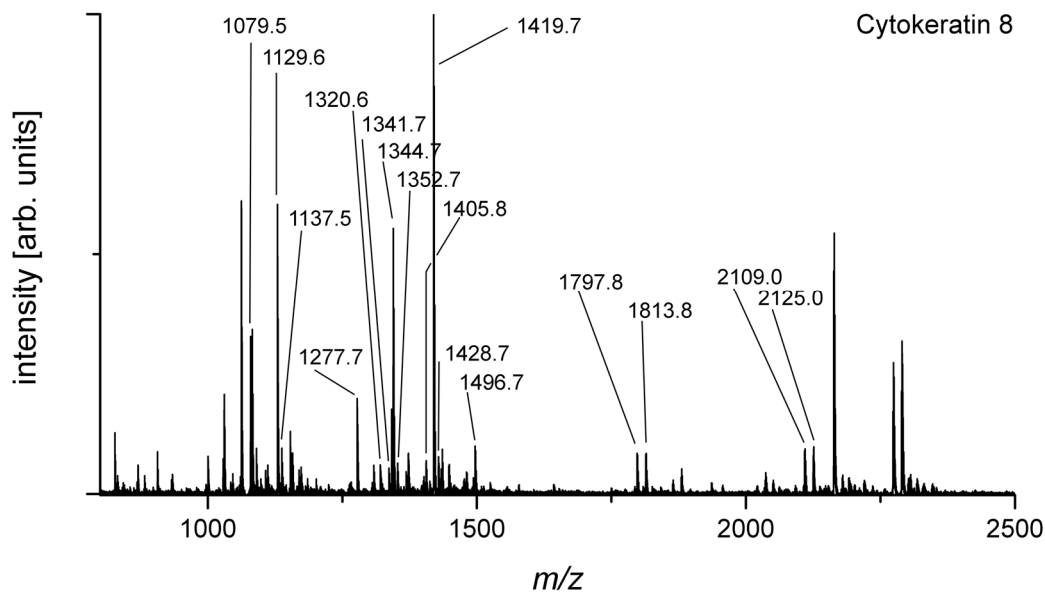

**Supplementary Figure 7.** MALDI-TOF MS tryptic peptide mass fingerprint of Keratin, type II cytoskeletal 8 (Swiss Prot Acc no. P05787). Spot numbers refer to designated protein spots in Fig. 3 and 4 of the main text.

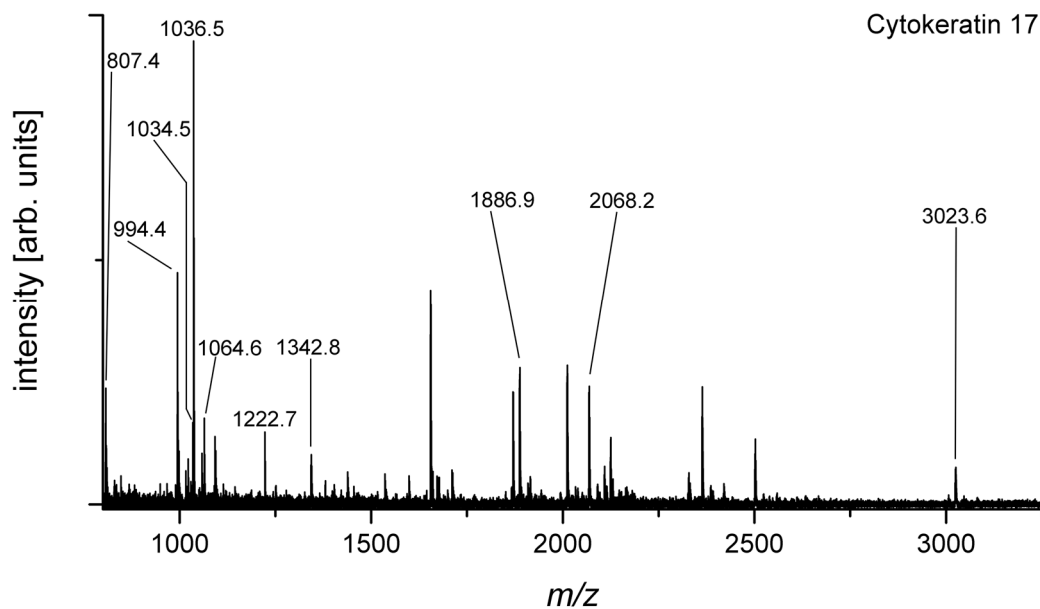

**Supplementary Figure 8.** MALDI-TOF MS tryptic peptide mass fingerprint of Keratin, type I cytoskeletal 17 (Swiss Prot Acc no. Q04695). Spot numbers refer to designated protein spots in Fig. 3 and 4 of the main text.

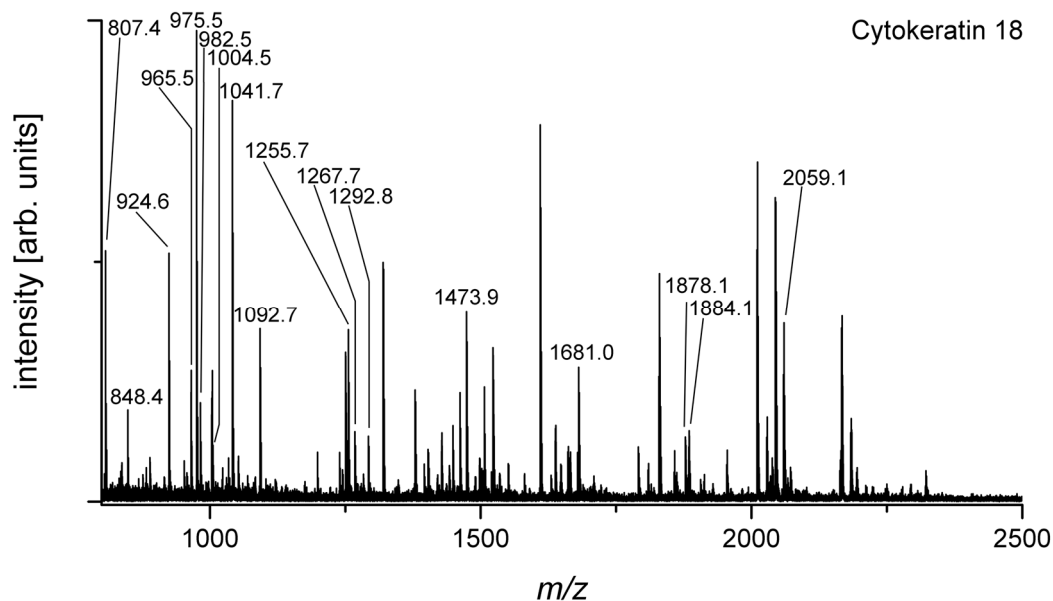

**Supplementary Figure 9.** MALDI-TOF MS tryptic peptide mass fingerprint of Keratin, type I cytoskeletal 18 (Swiss Prot Acc no. P05783). Spot numbers refer to designated protein spots in Fig. 3 and 4 of the main text.

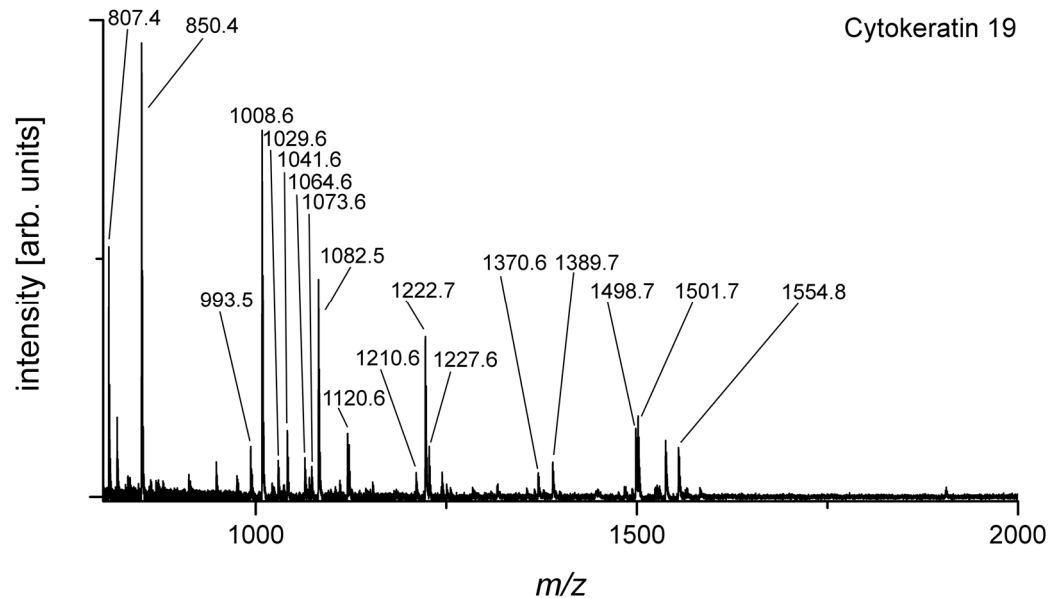

**Supplementary Figure 10.** MALDI-TOF MS tryptic peptide mass fingerprint of Keratin, type I cytoskeletal 19 (Swiss Prot Acc no. P08727). Spot numbers refer to designated protein spots in Fig. 3 and 4 of the main text.

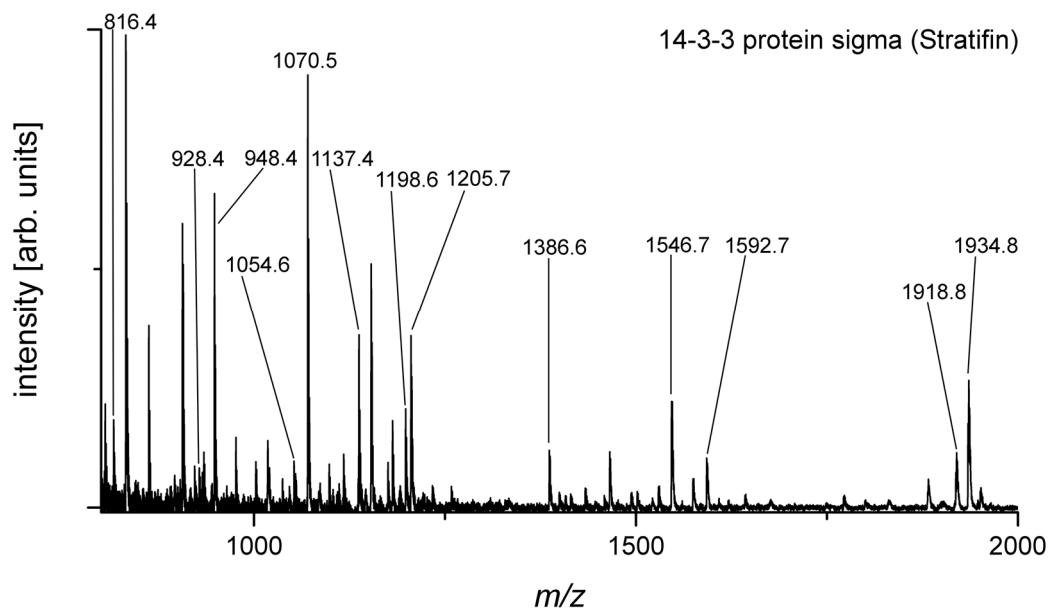

**Supplementary Figure 11.** MALDI-TOF MS tryptic peptide mass fingerprint of 14-3-3 protein sigma (Stratifin) (Swiss Prot Acc no. P31947). Spot numbers refer to designated protein spots in Fig. 3 and 4 of the main text.

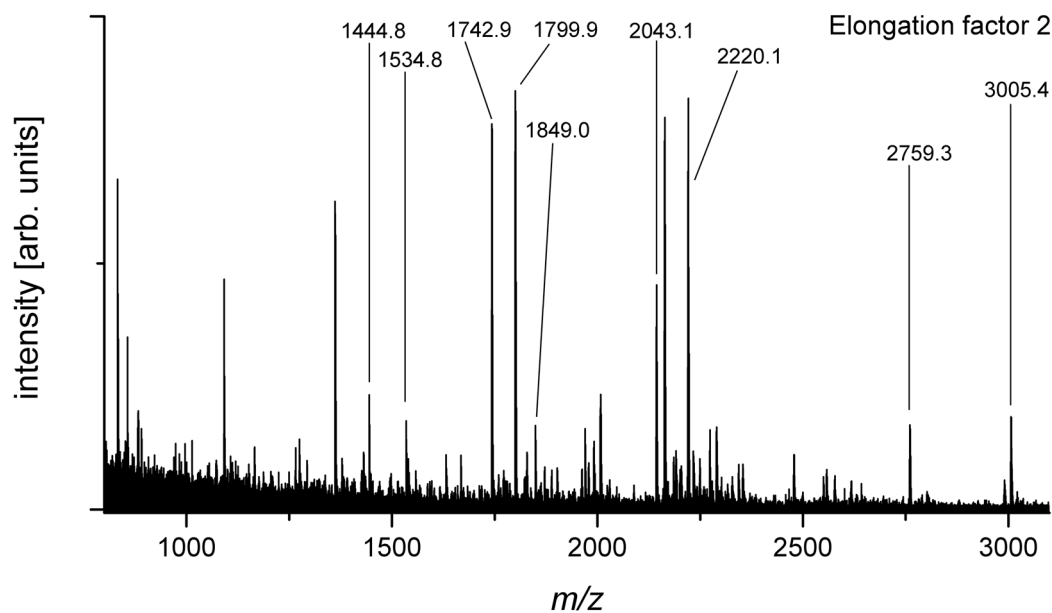

**Supplementary Figure 12.** MALDI-TOF MS tryptic peptide mass fingerprint of Elongation factor 2 (Swiss Prot Acc no. P13639). Spot numbers refer to designated protein spots in Fig. 3 and 4 of the main text.

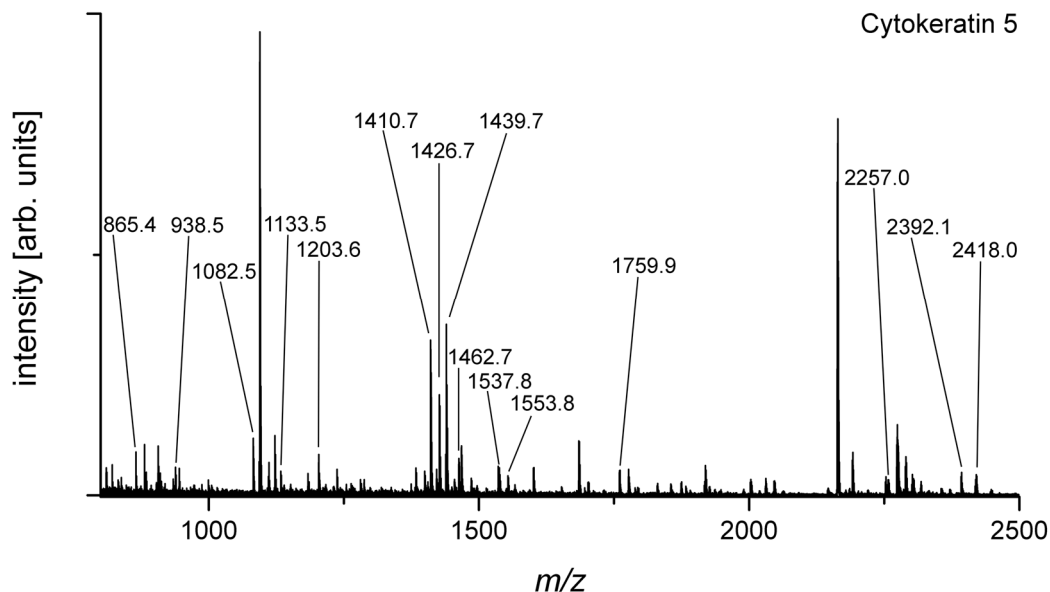

**Supplementary Figure 13.** MALDI-TOF MS tryptic peptide mass fingerprint of Keratin, type II cytoskeletal 5 (Swiss Prot Acc no. P13647). Spot numbers refer to designated protein spots in Fig. 3 and 4 of the main text.

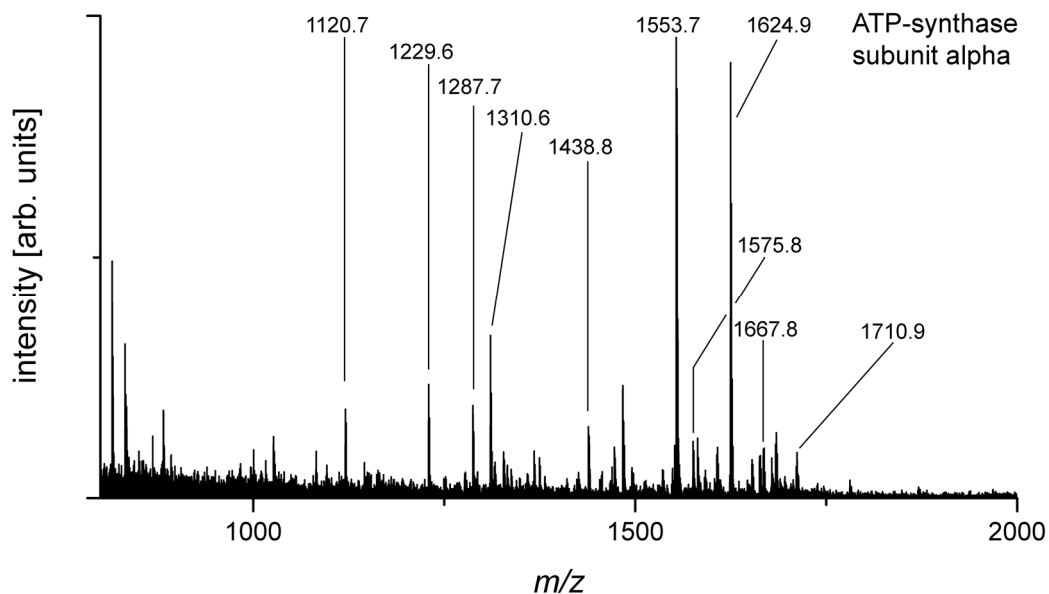

**Supplementary Figure 14.** MALDI-TOF MS tryptic peptide mass fingerprint of ATP synthase subunit alpha (Swiss Prot Acc no. P25705). Spot numbers refer to designated protein spots in Fig. 3 and 4 of the main text.

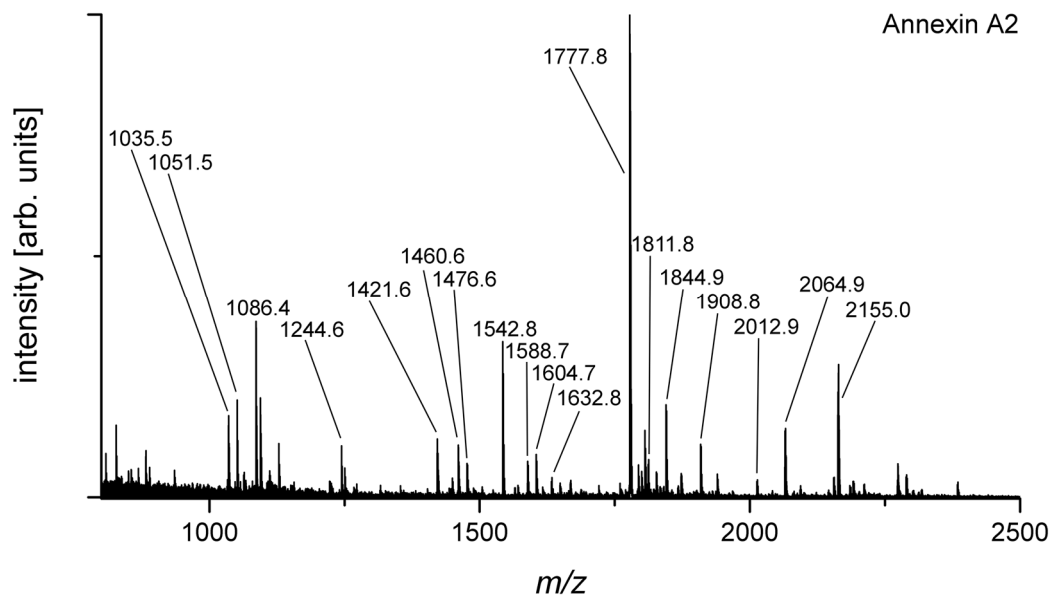

**Supplementary Figure 15.** MALDI-TOF MS tryptic peptide mass fingerprint of Annexin A2 (Swiss Prot Acc no. P07355). Spot numbers refer to designated protein spots in Fig. 3 and 4 of the main text.

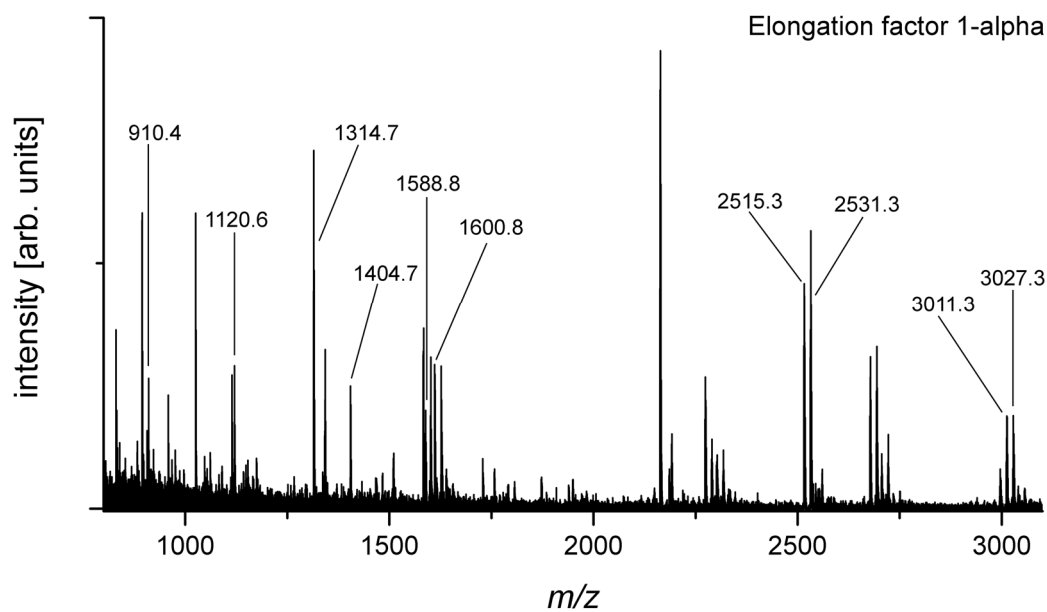

**Supplementary Figure 16.** MALDI-TOF MS tryptic peptide mass fingerprint of Elongation factor 1-alpha 1 (Swiss Prot Acc no. P68104). Spot numbers refer to designated protein spots in Fig. 3 and 4 of the main text.

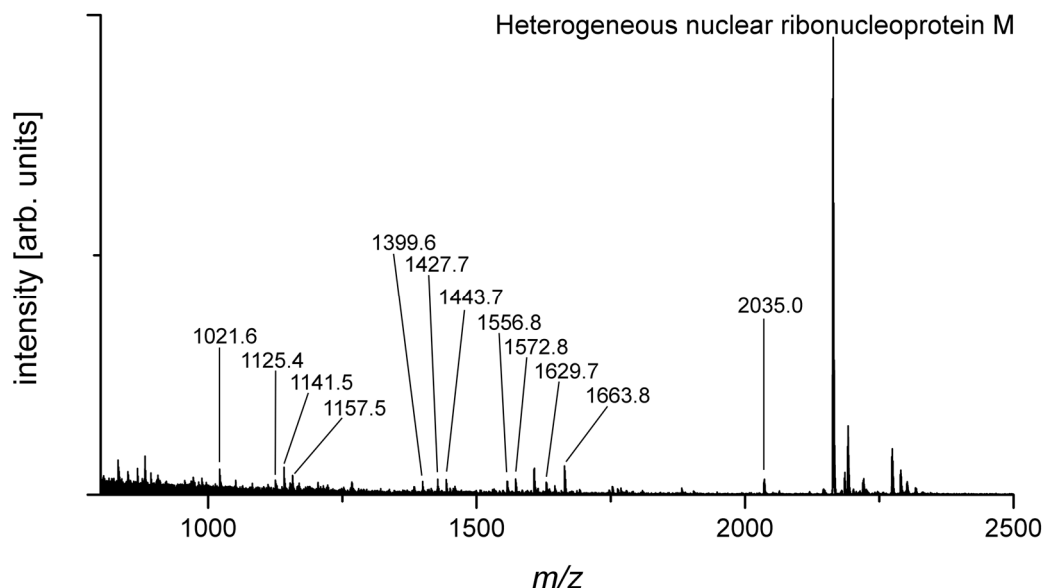

**Supplementary Figure 17.** MALDI-TOF MS tryptic peptide mass fingerprint of Heterogeneous nuclear ribonucleoprotein M (Swiss Prot Acc no. P52272). Spot numbers refer to designated protein spots in Fig. 3 and 4 of the main text.

## REFERENCES

1. Laemmli, U. K., Cleavage of structural proteins during the assembly of the head of bacteriophage T4. *Nature* **1970**, 227, (5259), 680-5.
2. Neuheff, V.; Arold, N.; Taube, D.; Ehrhardt, W., Improved staining of proteins in polyacrylamide gels including isoelectric focusing gels with clear background at nanogram sensitivity using Coomassie Brilliant Blue G-250 and R-250. *Electrophoresis* **1988**, 9, (6), 255-62.
3. Shevchenko, A.; Wilm, M.; Vorm, O.; Mann, M., Mass spectrometric sequencing of proteins silver-stained polyacrylamide gels. *Anal Chem* **1996**, 68, (5), 850-8.
4. Pantel, K.; Schlimok, G.; Angstwurm, M.; Weckermann, D.; Schmaus, W.; Gath, H.; Passlick, B.; Izbicki, J. R.; Riethmuller, G., Methodological analysis of immunocytochemical screening for disseminated epithelial tumor cells in bone marrow. *J Hematother* **1994**, 3, (3), 165-73.

5. Braun, S.; Pantel, K.; Muller, P.; Janni, W.; Hepp, F.; Kentenich, C. R.; Gastroph, S.; Wischnik, A.; Dimpfl, T.; Kindermann, G.; Riethmuller, G.; Schlimok, G., Cytokeratin-positive cells in the bone marrow and survival of patients with stage I, II, or III breast cancer. *N Engl J Med* **2000**, 342, (8), 525-33.
